# Supplementary material for: Implementing care coordination in a large dental care organization in the United States by upskilling front office personnel
Source: Hum Resour Health. 2021 Apr 7;19:48. doi: 10.1186/s12960-021-00593-0 (PMC8028788; doi:10.1186/s12960-021-00593-0)
Supplement: Supplementary file 2 — Additional file 2. Post-survey results (means) by demographics and role. Contains a table of each post-survey item with mean responses stratified by job type (dental care advocates, managers), age group, race/ethnicity, and gender. Table legend: † only asked on follow-up (post) survey; ‡ reverse coded; DCA = dental care advocate; AI/AN = American Indian/Alaska Native; ND = insufficient data to report; Individual survey questions were not mandatory, so the reported n varies by item response. [file 12960_2021_593_MOESM2_ESM.xlsx]

## Sheet: Sheet1
Additional file 2. Post survey results (means) by demographics and role
Survey Section	Survey Items			Age group						Race/ethnicity							Gender
		Role	Total	Under 35	35-44	45-54	55-64	65+	Unknown	White	Hispanic / Latinx	Asian	Black	Other	AI / AN	Unknown	Male	Female	Unknown
Attitudes and beliefs about the new care advocate role	You understand the role of the care advocate	DCAs	4.21368	4.18182	4.58824	4.27273	4.66667	ND	3.84	4.2	4.66667	4	ND	4.66667	3.33333	4.25	4	4.23762	4.09091
		Managers	4.84615	4.9	4.96	4.81818	4.83333	5	4.5	4.88	5	4.8	5	ND	5	4.4	4.8	4.90244	4.5
	The investment in care coordination is worthwhile	DCAs	4.03419	4.09091	4.47059	4.36364	4.11111	ND	3.44	4.0375	4.66667	3.8	ND	4	4.33333	3.66667	3.8	4.07921	3.72727
		Managers	4.73846	5	4.64	4.90909	4.66667	5	4.5	4.8	5	4.4	4.5	ND	4	4.6	4.55	4.82927	4.75
	You believe implementing the care advocate role is important	DCAs	3.95652	4.03774	4.35294	4.36364	3.88889	ND	3.36	4.025	4.375	3.7	ND	3.66667	4	3.5	4.2	4.0101	3.36364
		Managers	4.86154	5	4.92	4.81818	4.83333	5	4.6	4.9	5	4.6	5	ND	4	4.8	4.8	4.87805	5
	Implementing care coordination positions WDG to adapt to a changing health care environment	DCAs	4.01724	4.12727	4.35294	4.36364	4.22222	ND	3.29167	4.06329	4.66667	3.8	ND	3.66667	4	3.5	3.6	4.11	3.36364
		Managers	4.63077	4.7	4.56	4.81818	4.66667	5	4.4	4.72	4	4.4	4	ND	4	4.6	4.5	4.68293	4.75
	Implementing care coordination provides WDG a competitive edge in the dental marketplace	DCAs	3.99123	4.05455	4.17647	4.5	4	ND	3.47826	4.05063	4.44444	3.88889	ND	3.33333	4	3.45454	4.25	4.0404	3.45454
		Managers	4.57143	4.7	4.47826	4.81818	4.66667	5	4.2	4.63265	4	4.4	4	ND	4	4.6	4.47368	4.6	4.75
	You are excited about the care advocate role	DCAs	3.75862	3.81818	4.29412	4.18182	4.22222	ND	2.875	3.77215	4.22222	3.4	ND	4	4	3.5	3.6	3.81188	3.3
		Managers	4.75385	4.9	4.8	4.81818	4.5	5	4.5	4.8	5	4.6	4.5	ND	3	4.8	4.55	4.82927	5
	There is sufficient scientific evidence to support implementing care coordination in dentistry	DCAs	3.72973	3.78846	4.11765	3.7	3.88889	ND	3.26087	3.66667	4.44444	3.5	ND	3.66667	4.66667	3.54546	3.6	3.75	3.6
		Managers	4.40984	4.4	4.43478	4.72727	4	4.66667	4.125	4.5	3.5	4.4	4	ND	ND	4	4.47368	4.42105	4
	The goals of the care advocate role were clearly communicatedƚ	DCAs	3.71552	3.65455	3.88235	4	4.11111	ND	3.48	3.65	4.25	3.7	ND	4	3	3.91667	4.4	3.67	3.81818
		Managers	4.32308	4.3	4.32	4.18182	5	5	3.9	4.4	4	4.4	4.5	ND	3	3.8	4.4	4.34146	3.75
	The care advocate role will be/was able to be adapted to your specific clinical environment	DCAs	3.64286	3.69811	3.76471	4.09091	4	ND	3.08696	3.6282	4	3.8	ND	3.66667	2.66667	3.55556	3.6	3.64948	3.6
		Managers	4.20312	4.44444	4.08	4.36364	4.66667	5	3.6	4.32653	4	4.2	4	ND	4	3.2	4.2	4.275	3.5
	The care advocate role has been working well in the practice where I workƚ	DCAs	3.62281	3.64815	3.94118	4.18182	4	ND	2.95833	3.64557	4.33333	3.5	ND	3.66667	3.33333	3	3.6	3.66667	3.2
		Managers	4.20312	4.6	4.20833	4.36364	4	5	3.5	4.40816	4	4.2	3.5	ND	3	2.8	4.1	4.4	2.75
	Training and/or preparation for the care advocate position was sufficientƚ	DCAs	3.57391	3.50943	3.88235	4.09091	4.11111	ND	3.08	3.58974	4.22222	3.4	ND	4	2	3.41667	3.4	3.61616	3.27273
		Managers	4.21539	4.3	4.36	4.09091	4.33333	5	3.6	4.3	4.5	4.4	4.5	ND	2	3.4	4.1	4.31707	3.75
	I was given an opportunity to provide feedback on the care advocate roleƚ	DCAs	3.52991	3.49091	4.17647	3.72727	3.66667	ND	3.04	3.4625	4.66667	3.2	ND	3.33333	2.66667	3.66667	3.4	3.53465	3.54546
		Managers	4.09375	4.4	4.20833	3.72727	4.16667	5	3.6	4.2	4	4.5	3	ND	3	3.4	4	4.2	3.5
	Integrating the care advocate role into your practice was difficultⱡ	DCAs	3.41964	3.53846	3.52941	3.81818	4	ND	2.70833	3.48718	3.88889	3.5	ND	3.33333	2.5	2.6	3.6	3.48454	2.7
		Managers	3.60938	3.7	3.64	4.3	3.83333	2.33333	3	3.7551	4	3.6	3.5	ND	2	2.4	3.45	3.775	2.75
Beliefs about the new role’s impact	Improve communication with patients	DCAs	4.23478	4.36364	4.41176	4.18182	4.44444	ND	3.73913	4.3	4.55556	4	ND	4	4.66667	3.6	4.2	4.29703	3.55556
		Managers	4.76923	4.9	4.8	4.81818	5	5	4.3	4.82	5	4.6	5	ND	4	4.4	4.7	4.82927	4.5
	Help patients feel more supported	DCAs	4.17699	4.31482	4.35294	4.18182	4.44444	ND	3.59091	4.20253	4.66667	4	ND	4	4.66667	3.6	4.2	4.23232	3.55556
		Managers	4.70769	4.9	4.64	4.81818	5	5	4.3	4.74	5	4.6	5	ND	4	4.4	4.6	4.78049	4.5
	Improve team communication about patient care	DCAs	3.93913	3.98182	4.41176	4.1	4	ND	3.41667	3.97468	4.55556	3.6	ND	3.66667	4	3.54546	3.4	4.01	3.5
		Managers	4.57143	4.6	4.68	4.7	4.5	5	4.1	4.64583	4.5	4.6	4.5	ND	3	4.2	4.31579	4.725	4.25
	Enhance the effectiveness of clinical care	DCAs	3.94737	4.07407	4.23529	4	4.11111	ND	3.34783	3.93671	4.66667	3.8	ND	3.66667	4.33333	3.5	3.6	4.02	3.33333
		Managers	4.52308	4.7	4.4	4.72727	4.5	5	4.3	4.6	4	4.4	4.5	ND	4	4.2	4.5	4.58537	4
	Improve the quality of dental care	DCAs	3.96522	4.05455	4.35294	4	4.33333	ND	3.30435	3.9875	4.55556	3.5	ND	4	4.66667	3.5	3.4	4.0297	3.55556
		Managers	4.49206	4.7	4.32	4.72727	4.66667	5	4.22222	4.54167	4	4.6	4.5	ND	4	4.2	4.36842	4.575	4.25
	Improve patients' oral health	DCAs	3.92793	4.11321	4.35294	3.9	4	ND	3.13636	3.89744	4.55556	4	ND	3.66667	4.66667	3.33333	3.8	3.97959	3.375
		Managers	4.52381	4.9	4.36	4.54545	4.66667	5	4.25	4.5625	4	4.6	5	ND	4	4.2	4.4	4.61538	4.25
	Improve patient compliance with provider recommendations	DCAs	3.89474	4.07273	4.17647	4.1	4.11111	ND	3.08696	3.88608	4.66667	3.9	ND	3.66667	4	3.3	3.6	3.96	3.33333
		Managers	4.53125	4.9	4.5	4.63636	4.5	5	4	4.57143	4	4.6	5	ND	4	4.2	4.45	4.6	4.25
	Improve practices' productivity and efficiency	DCAs	3.57522	3.68519	3.88235	3.90909	3.77778	ND	2.81818	3.53846	4.44444	3.4	ND	3.66667	3.66667	3.2	3.2	3.64647	3
		Managers	4.35385	4.6	4.32	4.54545	4	5	4	4.44	4	4.6	4	ND	3	3.8	4.25	4.43902	4
	Improve workflow in my practice	DCAs	3.41228	3.5	3.70588	3.9	3.77778	ND	2.66667	3.39744	4.11111	3.2	ND	3.66667	3.33333	3.09091	3.2	3.48485	2.8
		Managers	4.36923	4.6	4.32	4.63636	4.33333	5	3.8	4.48	4	4.6	4	ND	3	3.6	4.35	4.43902	3.75
Efficacy and general work satisfaction	Please rate your confidence level in your personal ability to adapt to change	DCAs	4.31532	4.27778	4.47059	4.45455	4.44444	ND	4.15	4.3038	4.55556	4.2	ND	4.33333	4.33333	4.28571	4.2	4.32	4.33333
		Managers	4.72308	4.7	4.8	4.63636	5	5	4.4	4.78	4.5	4.8	4.5	ND	4	4.4	4.75	4.73171	4.5
	Please rate how well you feel your personal values are aligned with the values of the organization	DCAs	4.20536	4.32727	4.47059	4	4.22222	ND	3.75	4.1875	4.77778	3.9	ND	3.33333	4.66667	4.28571	3.8	4.22772	4.16667
		Managers	4.69231	4.6	4.8	4.72727	5	5	4.2	4.78	4.5	4.6	4.5	ND	4	4.2	4.65	4.7561	4.25
	All in all, how satisfied would you say you are with your job?	DCAs	4.00893	3.90909	4.23529	4.27273	4.33333	ND	3.8	3.9625	4.55556	3.9	ND	3.66667	3.66667	4.28571	3.4	4.0297	4.16667
		Managers	4.72308	4.4	4.8	4.63636	5	5	4.7	4.74	4.5	4.8	5	ND	4	4.6	4.6	4.78049	4.75
	Please rate how well you feel integrated in the oral health care team	DCAs	3.89189	3.92727	4.05882	3.90909	3.88889	ND	3.63158	3.92405	4.55556	3.5	ND	3	4	3.57143	4.25	3.88119	3.83333
		Managers	4.45312	4.5	4.4	4.6	4.83333	5	4	4.55102	4	4.2	4	ND	4	4.2	4.5	4.475	4
	Please rate the extent to which you feel you have adequate resources and support to get your work done	DCAs	3.86607	3.90909	4	3.81818	4.11111	ND	3.55	3.825	4.33333	3.9	ND	3.33333	3.66667	4	3.6	3.89109	3.66667
		Managers	4.2	4	4.12	4.45455	4.83333	5	3.7	4.32	3	4.2	4.5	ND	4	3.4	4.3	4.21951	3.5
	Please rate your confidence level in your team's ability to adapt to change	DCAs	3.83784	3.90909	3.94118	3.9	4	ND	3.45	3.79747	4.55556	3.9	ND	3.66667	4	3.28571	3.4	3.89	3.33333
		Managers	4.24615	3.9	4.36	4.09091	4.33333	5	4.2	4.22	4	4.6	4	ND	4	4.4	4.25	4.21951	4.5
	Please rate how well you feel your current skills are being utilized within the organization	DCAs	3.71429	3.8	4.05882	3.81818	3.66667	ND	3.15	3.7375	4.22222	3.5	ND	2.66667	4	3.42857	2.6	3.76238	3.83333
		Managers	4.38462	4	4.6	4.45455	4.66667	5	3.8	4.46	4.5	4.2	4.5	ND	3	4	4.4	4.41463	4
	Please rate the current effectiveness of communication within your practice/team	DCAs	3.75893	3.85454	3.70588	3.72727	3.88889	ND	3.5	3.775	4.33333	3.6	ND	3	3.66667	3.42857	3.4	3.80198	3.33333
		Managers	4.14062	3.9	4.25	3.90909	4.33333	5	4	4.22	3	4.5	4	ND	4	3.6	4.35	4.075	3.75
	Please rate the extent to which you feel you have influence over work and work-related factors	DCAs	3.45283	3.46154	3.75	3.55556	3.22222	ND	3.25	3.42857	3.875	3.33333	ND	3	3.66667	3.42857	3.4	3.43158	3.83333
		Managers	4.41538	4.3	4.44	4.36364	4.83333	4.66667	4.2	4.48	4	4.2	4.5	ND	4	4.2	4.25	4.5122	4.25
Item response scale: 1 = strongly disagree/very low, 2 = disagree/low, 3 = neither agree nor disagree/medium, 4 = agree/high, 5 = strongly agree/very high
ƚ only asked on follow-up (post) survey
ⱡ reverse coded
DCA = dental care advocates
AI/AN = American Indian/Alaska Native
ND = insufficient data to report
Individual survey questions were not mandatory, so the reported n varies by item response.
